# Supplementary material
Source: PubMed Central journal article supplement (PMC3985859)
Supplement: NIHMS359590-supplement-1.pdf [file NIHMS359590-supplement-1.pdf]

eTable 1: Community specific daily average air pollution levels over 1995-1996 and predicted <sub>a</sub> average growth in lung function over 1993-1996.

| Community | N <sub>b</sub> | Air pollution measures<br>(µg /m <sup>3</sup> ) |                                   | N <sub>c</sub> | Growth in lung function<br>(ml /yr) |                      |
|-----------|----------------|-------------------------------------------------|-----------------------------------|----------------|-------------------------------------|----------------------|
|           |                | PM <sub>2.5</sub><br>Mean (95%CI)               | PM <sub>10</sub><br>Mean (95% CI) |                | FEV <sub>1</sub><br>Mean (95%CI)    | FVC<br>Mean (95% CI) |
| Guangzhou |                |                                                 |                                   |                |                                     |                      |
| Urban     | 103            | 142 (35, 325)                                   | 232 (94, 422)                     | 415            | 213 (186, 240)                      | 225 (194, 256)       |
| Suburban  | 111            | 70 (23, 161)                                    | 118 (43, 244)                     | 411            | 197 (172, 222)                      | 230 (201, 259)       |
| Wuhan     |                |                                                 |                                   |                |                                     |                      |
| Urban     | 94             | 73 (14, 195)                                    | 129 (43, 265)                     | 280            | 153 (33, 273)                       | 178 (39, 317)        |
| Suburban  | 96             | 52 (18, 105)                                    | 81 (31, 162)                      | 136            | 34 (-264, 332)                      | 105 (-275, 485)      |
| Lanzhou   |                |                                                 |                                   |                |                                     |                      |
| Urban     | 113            | 115 (25, 246)                                   | 222 (78, 466)                     | 428            | 185 (144, 226)                      | 221 (174, 268)       |
| Suburban  | 112            | 98 (24, 287)                                    | 165 (54, 385)                     | 428            | 201 (170, 232)                      | 220 (187, 253)       |
| Chongqing |                |                                                 |                                   |                |                                     |                      |
| Urban     | 118            | 94 (25, 243)                                    | 148 (52, 330)                     | 760            | 214 (192, 236)                      | 243 (218, 268)       |
| Suburban  | 112            | 82 (24, 189)                                    | 113 (42, 234)                     | 415            | 232 (191, 273)                      | 261 (216, 306)       |

a: adjusted for baseline age, sex, body mass index, asthma status, parental education, presence of ventilation in the house, use of coal for cooking or heating, fathers smoking status and repeated measures using GEE models

b: number of daily air pollution measures from January 1995 to December 1996.

c: number of children who had baseline lung function measurements
